# Supplementary material for: Depletion of exosomal circLDLR in follicle fluid derepresses miR-1294 function and inhibits estradiol production via CYP19A1 in polycystic ovary syndrome
Source: publisher site journal article supplement (doi:10.18632/aging.103602), 2020-07-10

## SUPPLEMENTARY TABLES

**Supplementary Table 1. Sequences of PCR primers.**

| Gene                                                    | Forward primer (5'-3') | Reverse primer (5'-3')                                        |
|---------------------------------------------------------|------------------------|---------------------------------------------------------------|
| chr19:11230768-11231198<br>( hsa_circ_0006877/circLDLR) | GCGGCTGCCAGTATCTGT     | TTGGCTGGGTGAGGTTGT                                            |
| chrM:2262-2426 (novel)                                  | AGGCTTATGCGGAGGAGAA    | GCGTCAGATCAAAACACTGAA                                         |
| chr13:110076504-110076682<br>(novel)                    | AGGGCTAAGCATAGTGGGG    | ACCTGGCGGTGCTTCATA                                            |
| chr15:68352856-68353111<br>(novel)                      | TGCCATTTAAATTGGGAGG    | GGCACGGTCTCAGCTCTC                                            |
| chr17:16075117-16097953<br>( hsa_circ_0005069)          | GCTGCGGTTTTGCCTTTA     | AATGCTCCTTGGTTGGGA                                            |
| CYP19A1                                                 | GAGAATTCATGCGAGTCTGGA  | CATTATGTGGAACATACTTGAGG<br>ACT                                |
| miR-1294                                                | TGTGAGGTTGGCATTG       | GTCGTATCCAGTGCGTGCCTGG<br>AGTCGGCAATTGCACTGGATACG<br>ACagacaa |
| GAPDH                                                   | CGCTGAGTACGTGCGTGGAGTC | GCTGATGATCTTGAGGCTGTTGTC                                      |
| ACTB                                                    | GGATCAGCAAGCAGGAGT     | AAAGCCATGCCAATCTCATC                                          |
| U6                                                      | CTCGCTTCGGCAGCACA      | AACGCTTCACGAATTTGCGT                                          |

Please browse Full Text version to see the data of Supplementary Tables 2 to 6.

**Supplementary Table 2. The GO analysis of the coding genes of up-regulated circRNAs.**

**Supplementary Table 3. The GO analysis of the coding genes of down-regulated circRNAs.**

**Supplementary Table 4. KEGG pathway analysis of the coding genes of dysregulated circRNAs.**

**Supplementary Table 5. The miRNAs predicted to possess MREs in circLDLR.**

**Supplementary Table 6. The genes associated with hsa\_circ\_0006877-miRNA-mRNA ceRNA network.**

Supplementary Table 7. The Sanger sequence of hsa\_circ\_0006877 (chr19:11230768-11231198+).

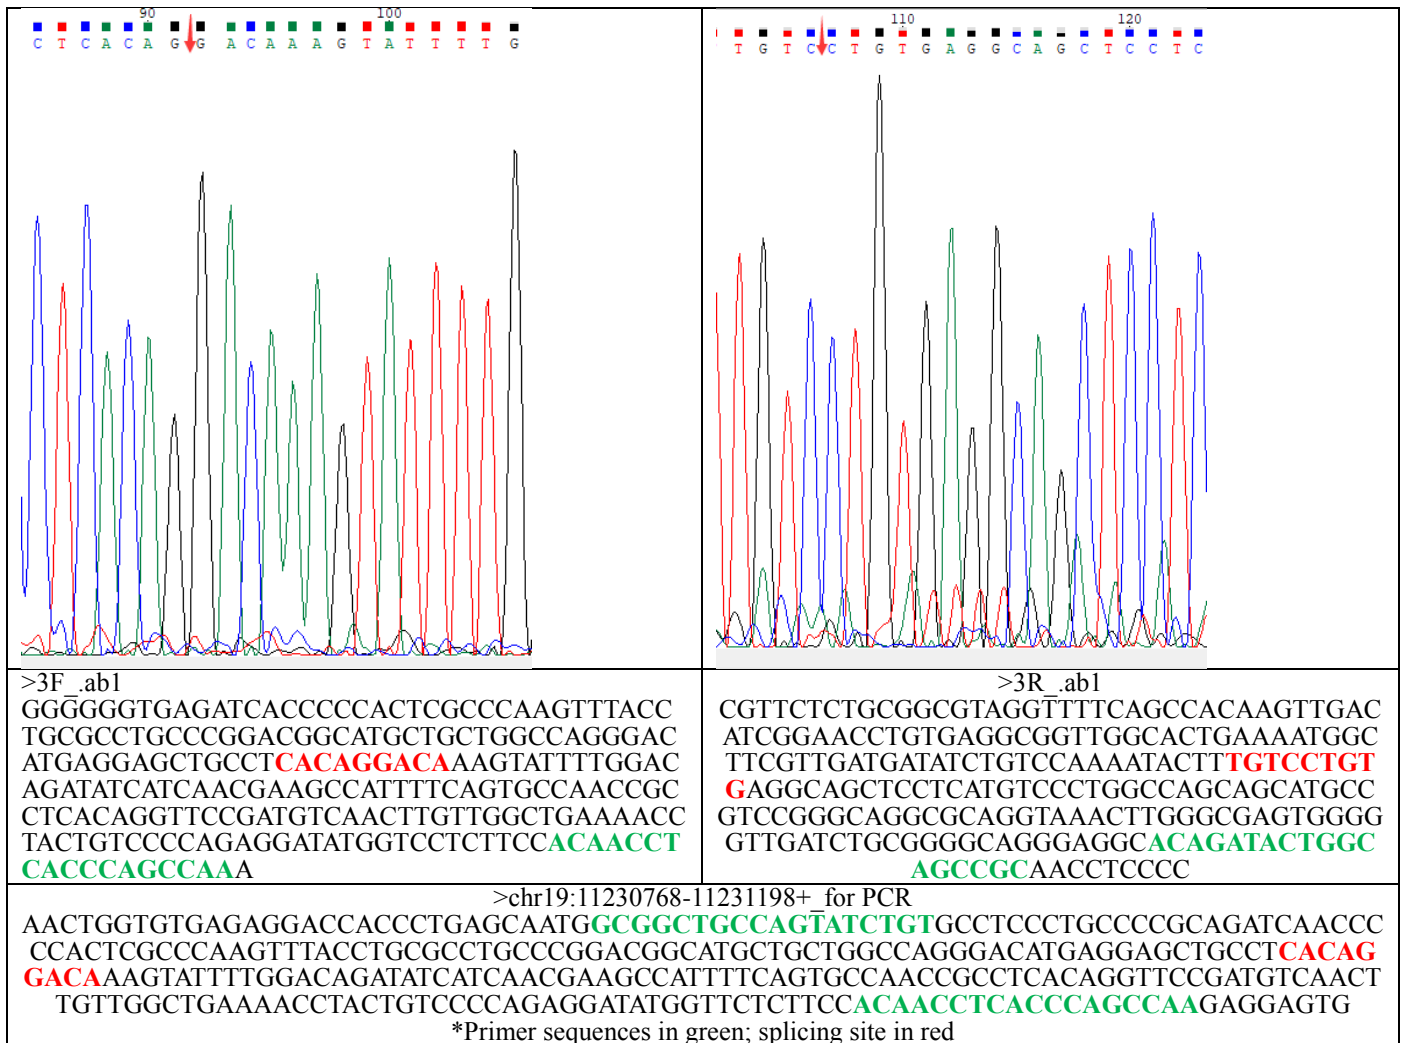

Supplement: Supplementary file [file aging-v12i15-103602-supplementary-material-SD1.pdf]
