# Supplementary material for: Depletion of exosomal circLDLR in follicle fluid derepresses miR-1294 function and inhibits estradiol production via CYP19A1 in polycystic ovary syndrome
Source: Aging (Albany NY). 2020 Jul 10;12(15):15414–35. doi: 10.18632/aging.103602 (PMC7467373; doi:10.18632/aging.103602)
Supplement: Supplementary Table 2 [file aging-12-103602-s003..xls]

## Sheet: BP
#Column "GO.ID" stands for the ID of gene ontology term
#Column "Term" stands for the name of gene ontology term
#Column "Ontology" stands for the ontology of GOID belongs to
#Column "Count" stands for the number of DE genes associated with the listed GOID
#Column "Pop.Hits" stands for the number of background population genes associated with the listed GOID
#Column "List.Total" stands for the total number of DE genes
#Column "Pop.Total" stands for the total number of background population genes
#Column "Fold.Enrichment" stands for the Fold Enrichment value of the GOID, it equals (Count/Pop.Hits)/(List.Total/Pop.Total)
#Column "Pvalue" stands for the significance testing value of the GOID
#Column "FDR" stands for the false discovery rate of the GOID, using Benjamini & Hochberg (1995) method
#Column "Enrichment.Score" stands for the Enrichment Score value of the GOID, it equals (-log10(Pvalue))
#Column "Gene.Ratio" stands for the Gene Ratio value genes associated with the GOID, it equals (Count/List.Total)
#Column "GENES" stands for the DE genes associated with the GOID
GO.ID	Term	Ontology	Count	Pop.Hits	List.Total	Pop.Total	Fold.Enrichment	Pvalue	FDR	Enrichment.Score	Gene.Ratio	GENES
GO:0016458	gene silencing	Biological process	1	102	1	16119	158.029	0.00632794	1	2.19874	1	SCMH1
GO:0006338	chromatin remodeling	Biological process	1	117	1	16119	137.769	0.00725851	1	2.13915	1	SCMH1
GO:0009952	anterior/posterior pattern specification	Biological process	1	208	1	16119	77.4952	0.012904	1	1.88927	1	SCMH1
GO:0003002	regionalization	Biological process	1	340	1	16119	47.4088	0.0210931	1	1.67586	1	SCMH1
GO:0007389	pattern specification process	Biological process	1	436	1	16119	36.9702	0.0270488	1	1.56785	1	SCMH1
GO:0007283	spermatogenesis	Biological process	1	449	1	16119	35.8998	0.0278553	1	1.55509	1	SCMH1
GO:0048232	male gamete generation	Biological process	1	450	1	16119	35.82	0.0279174	1	1.55413	1	SCMH1
GO:0016568	chromatin modification	Biological process	1	530	1	16119	30.4132	0.0328805	1	1.48306	1	SCMH1
GO:0007276	gamete generation	Biological process	1	565	1	16119	28.5292	0.0350518	1	1.45529	1	SCMH1
GO:0006325	chromatin organization	Biological process	1	615	1	16119	26.2098	0.0381537	1	1.41846	1	SCMH1
GO:0019953	sexual reproduction	Biological process	1	707	1	16119	22.7992	0.0438613	1	1.35792	1	SCMH1
GO:0048609	multicellular organismal reproductive process	Biological process	1	723	1	16119	22.2946	0.0448539	1	1.3482	1	SCMH1
GO:0032504	multicellular organism reproduction	Biological process	1	748	1	16119	21.5495	0.0464049	1	1.33344	1	SCMH1

## Sheet: MF
There is no enriched MF terms

## Sheet: CC
#Column "GO.ID" stands for the ID of gene ontology term
#Column "Term" stands for the name of gene ontology term
#Column "Ontology" stands for the ontology of GOID belongs to
#Column "Count" stands for the number of DE genes associated with the listed GOID
#Column "Pop.Hits" stands for the number of background population genes associated with the listed GOID
#Column "List.Total" stands for the total number of DE genes
#Column "Pop.Total" stands for the total number of background population genes
#Column "Fold.Enrichment" stands for the Fold Enrichment value of the GOID, it equals (Count/Pop.Hits)/(List.Total/Pop.Total)
#Column "Pvalue" stands for the significance testing value of the GOID
#Column "FDR" stands for the false discovery rate of the GOID, using Benjamini & Hochberg (1995) method
#Column "Enrichment.Score" stands for the Enrichment Score value of the GOID, it equals (-log10(Pvalue))
#Column "Gene.Ratio" stands for the Gene Ratio value genes associated with the GOID, it equals (Count/List.Total)
#Column "GENES" stands for the DE genes associated with the GOID
GO.ID	Term	Ontology	Count	Pop.Hits	List.Total	Pop.Total	Fold.Enrichment	Pvalue	FDR	Enrichment.Score	Gene.Ratio	GENES
GO:0010369	chromocenter	Cellular component	1	12	1	17280	1440	0.000694444	0.459028	3.15836	1	SCMH1
GO:0044427	chromosomal part	Cellular component	1	630	1	17280	27.4286	0.0364583	1	1.4382	1	SCMH1
GO:0005694	chromosome	Cellular component	1	728	1	17280	23.7363	0.0421296	1	1.37541	1	SCMH1
