# Supplementary material for: Depletion of exosomal circLDLR in follicle fluid derepresses miR-1294 function and inhibits estradiol production via CYP19A1 in polycystic ovary syndrome
Source: Aging (Albany NY). 2020 Jul 10;12(15):15414–35. doi: 10.18632/aging.103602 (PMC7467373; doi:10.18632/aging.103602)
Supplement: Supplementary Table 3 [file aging-12-103602-s005..xls]

## Sheet: BP
#Column "GO.ID" stands for the ID of gene ontology term
#Column "Term" stands for the name of gene ontology term
#Column "Ontology" stands for the ontology of GOID belongs to
#Column "Count" stands for the number of DE genes associated with the listed GOID
#Column "Pop.Hits" stands for the number of background population genes associated with the listed GOID
#Column "List.Total" stands for the total number of DE genes
#Column "Pop.Total" stands for the total number of background population genes
#Column "Fold.Enrichment" stands for the Fold Enrichment value of the GOID, it equals (Count/Pop.Hits)/(List.Total/Pop.Total)
#Column "Pvalue" stands for the significance testing value of the GOID
#Column "FDR" stands for the false discovery rate of the GOID, using Benjamini & Hochberg (1995) method
#Column "Enrichment.Score" stands for the Enrichment Score value of the GOID, it equals (-log10(Pvalue))
#Column "Gene.Ratio" stands for the Gene Ratio value genes associated with the GOID, it equals (Count/List.Total)
#Column "GENES" stands for the DE genes associated with the GOID
GO.ID	Term	Ontology	Count	Pop.Hits	List.Total	Pop.Total	Fold.Enrichment	Pvalue	FDR	Enrichment.Score	Gene.Ratio	GENES
GO:0042632	cholesterol homeostasis	Biological process	2	67	4	16119	120.291	0.000101574	0.285729	3.99322	0.5	LDLR//NCOR1
GO:0055092	sterol homeostasis	Biological process	2	68	4	16119	118.522	0.000104643	0.285729	3.98029	0.5	LDLR//NCOR1
GO:0055088	lipid homeostasis	Biological process	2	99	4	16119	81.4091	0.000222265	0.404597	3.65313	0.5	LDLR//NCOR1
GO:0031329	regulation of cellular catabolic process	Biological process	3	823	4	16119	14.6892	0.000510321	0.696716	3.29216	0.75	LDLR//PIAS1//NCOR1
GO:0009894	regulation of catabolic process	Biological process	3	913	4	16119	13.2412	0.000693933	0.757914	3.15868	0.75	LDLR//PIAS1//NCOR1
GO:0006869	lipid transport	Biological process	2	246	4	16119	32.7622	0.00136395	1	2.8652	0.5	LDLR//NCOR1
GO:0010876	lipid localization	Biological process	2	278	4	16119	28.991	0.00173804	1	2.75994	0.5	LDLR//NCOR1
GO:2000188	regulation of cholesterol homeostasis	Biological process	1	10	4	16119	402.975	0.00247947	1	2.60564	0.25	LDLR
GO:0010867	positive regulation of triglyceride biosynthetic process	Biological process	1	11	4	16119	366.341	0.00272716	1	2.56429	0.25	LDLR
GO:0014067	negative regulation of phosphatidylinositol 3-kinase signaling	Biological process	1	11	4	16119	366.341	0.00272716	1	2.56429	0.25	NCOR1
GO:0033235	positive regulation of protein sumoylation	Biological process	1	11	4	16119	366.341	0.00272716	1	2.56429	0.25	PIAS1
GO:0046475	glycerophospholipid catabolic process	Biological process	1	11	4	16119	366.341	0.00272716	1	2.56429	0.25	LDLR
GO:0015711	organic anion transport	Biological process	2	362	4	16119	22.2638	0.00292886	1	2.5333	0.5	LDLR//NCOR1
GO:0030299	intestinal cholesterol absorption	Biological process	1	12	4	16119	335.812	0.00297481	1	2.52654	0.25	LDLR
GO:0090312	positive regulation of protein deacetylation	Biological process	1	12	4	16119	335.812	0.00297481	1	2.52654	0.25	NCOR1
GO:0021794	thalamus development	Biological process	1	13	4	16119	309.981	0.00322241	1	2.49182	0.25	NCOR1
GO:0045066	regulatory T cell differentiation	Biological process	1	14	4	16119	287.839	0.00346996	1	2.45968	0.25	NCOR1
GO:0010866	regulation of triglyceride biosynthetic process	Biological process	1	16	4	16119	251.859	0.00396493	1	2.40176	0.25	LDLR
GO:0033233	regulation of protein sumoylation	Biological process	1	17	4	16119	237.044	0.00421235	1	2.37548	0.25	PIAS1
GO:0034383	low-density lipoprotein particle clearance	Biological process	1	17	4	16119	237.044	0.00421235	1	2.37548	0.25	LDLR
GO:0044241	lipid digestion	Biological process	1	17	4	16119	237.044	0.00421235	1	2.37548	0.25	LDLR
GO:0051150	regulation of smooth muscle cell differentiation	Biological process	1	17	4	16119	237.044	0.00421235	1	2.37548	0.25	PIAS1
GO:0090208	positive regulation of triglyceride metabolic process	Biological process	1	17	4	16119	237.044	0.00421235	1	2.37548	0.25	LDLR
GO:0060216	definitive hemopoiesis	Biological process	1	20	4	16119	201.488	0.00495432	1	2.30502	0.25	NCOR1
GO:0006820	anion transport	Biological process	2	483	4	16119	16.6863	0.0051649	1	2.28694	0.5	LDLR//NCOR1
GO:0031063	regulation of histone deacetylation	Biological process	1	21	4	16119	191.893	0.00520155	1	2.28387	0.25	NCOR1
GO:0046329	negative regulation of JNK cascade	Biological process	1	22	4	16119	183.17	0.00544874	1	2.2637	0.25	NCOR1
GO:0050892	intestinal absorption	Biological process	1	22	4	16119	183.17	0.00544874	1	2.2637	0.25	LDLR
GO:2000191	regulation of fatty acid transport	Biological process	1	23	4	16119	175.207	0.00569587	1	2.24444	0.25	NCOR1
GO:0060334	regulation of interferon-gamma-mediated signaling pathway	Biological process	1	24	4	16119	167.906	0.00594297	1	2.226	0.25	PIAS1
GO:0060330	regulation of response to interferon-gamma	Biological process	1	25	4	16119	161.19	0.00619002	1	2.20831	0.25	PIAS1
GO:0090207	regulation of triglyceride metabolic process	Biological process	1	25	4	16119	161.19	0.00619002	1	2.20831	0.25	LDLR
GO:0006110	regulation of glycolytic process	Biological process	1	26	4	16119	154.99	0.00643702	1	2.19132	0.25	NCOR1
GO:0032873	negative regulation of stress-activated MAPK cascade	Biological process	1	27	4	16119	149.25	0.00668397	1	2.17497	0.25	NCOR1
GO:0070303	negative regulation of stress-activated protein kinase signaling cascade	Biological process	1	27	4	16119	149.25	0.00668397	1	2.17497	0.25	NCOR1
GO:0009395	phospholipid catabolic process	Biological process	1	29	4	16119	138.957	0.00717774	1	2.14401	0.25	LDLR
GO:0090311	regulation of protein deacetylation	Biological process	1	29	4	16119	138.957	0.00717774	1	2.14401	0.25	NCOR1
GO:0034381	plasma lipoprotein particle clearance	Biological process	1	31	4	16119	129.992	0.00767133	1	2.11513	0.25	LDLR
GO:0043470	regulation of carbohydrate catabolic process	Biological process	1	33	4	16119	122.114	0.00816474	1	2.08806	0.25	NCOR1
GO:0043471	regulation of cellular carbohydrate catabolic process	Biological process	1	33	4	16119	122.114	0.00816474	1	2.08806	0.25	NCOR1
GO:0000122	negative regulation of transcription from RNA polymerase II promoter	Biological process	2	616	4	16119	13.0836	0.00831092	1	2.08035	0.5	NCOR1//PIAS1
GO:0030163	protein catabolic process	Biological process	2	638	4	16119	12.6324	0.00889907	1	2.05066	0.5	PIAS1//LDLR
GO:0046503	glycerolipid catabolic process	Biological process	1	37	4	16119	108.912	0.00915099	1	2.03853	0.25	LDLR
GO:0016925	protein sumoylation	Biological process	1	40	4	16119	100.744	0.0098902	1	2.00479	0.25	PIAS1
GO:0031325	positive regulation of cellular metabolic process	Biological process	3	2283	4	16119	5.29534	0.0101475	1	1.99364	0.75	LDLR//PIAS1//NCOR1
GO:0032890	regulation of organic acid transport	Biological process	1	42	4	16119	95.9464	0.0103828	1	1.98369	0.25	NCOR1
GO:0050994	regulation of lipid catabolic process	Biological process	1	44	4	16119	91.5852	0.0108752	1	1.96356	0.25	LDLR
GO:0032436	positive regulation of proteasomal ubiquitin-dependent protein catabolic process	Biological process	1	45	4	16119	89.55	0.0111213	1	1.95384	0.25	PIAS1
GO:0051225	spindle assembly	Biological process	1	46	4	16119	87.6033	0.0113674	1	1.94434	0.25	NCOR1
GO:0032922	circadian regulation of gene expression	Biological process	1	47	4	16119	85.7394	0.0116134	1	1.93504	0.25	NCOR1
GO:0043367	CD4-positive, alpha-beta T cell differentiation	Biological process	1	48	4	16119	83.9531	0.0118594	1	1.92594	0.25	NCOR1
GO:0051145	smooth muscle cell differentiation	Biological process	1	48	4	16119	83.9531	0.0118594	1	1.92594	0.25	PIAS1
GO:0009893	positive regulation of metabolic process	Biological process	3	2413	4	16119	5.01005	0.0119013	1	1.9244	0.75	LDLR//PIAS1//NCOR1
GO:0015914	phospholipid transport	Biological process	1	49	4	16119	82.2398	0.0121054	1	1.91702	0.25	LDLR
GO:0031058	positive regulation of histone modification	Biological process	1	51	4	16119	79.0147	0.0125971	1	1.89973	0.25	NCOR1
GO:0046889	positive regulation of lipid biosynthetic process	Biological process	1	51	4	16119	79.0147	0.0125971	1	1.89973	0.25	LDLR
GO:1901800	positive regulation of proteasomal protein catabolic process	Biological process	1	51	4	16119	79.0147	0.0125971	1	1.89973	0.25	PIAS1
GO:0046164	alcohol catabolic process	Biological process	1	52	4	16119	77.4952	0.0128429	1	1.89134	0.25	LDLR
GO:0097006	regulation of plasma lipoprotein particle levels	Biological process	1	52	4	16119	77.4952	0.0128429	1	1.89134	0.25	LDLR
GO:1903052	positive regulation of proteolysis involved in cellular protein catabolic process	Biological process	1	52	4	16119	77.4952	0.0128429	1	1.89134	0.25	PIAS1
GO:1903310	positive regulation of chromatin modification	Biological process	1	52	4	16119	77.4952	0.0128429	1	1.89134	0.25	NCOR1
GO:0044248	cellular catabolic process	Biological process	3	2490	4	16119	4.85512	0.0130251	1	1.88522	0.75	LDLR//PIAS1//NCOR1
GO:0035710	CD4-positive, alpha-beta T cell activation	Biological process	1	53	4	16119	76.033	0.0130887	1	1.8831	0.25	NCOR1
GO:0016575	histone deacetylation	Biological process	1	54	4	16119	74.625	0.0133344	1	1.87503	0.25	NCOR1
GO:0019432	triglyceride biosynthetic process	Biological process	1	57	4	16119	70.6974	0.0140712	1	1.85167	0.25	LDLR
GO:0046460	neutral lipid biosynthetic process	Biological process	1	59	4	16119	68.3008	0.0145623	1	1.83677	0.25	LDLR
GO:0046463	acylglycerol biosynthetic process	Biological process	1	59	4	16119	68.3008	0.0145623	1	1.83677	0.25	LDLR
GO:0051149	positive regulation of muscle cell differentiation	Biological process	1	59	4	16119	68.3008	0.0145623	1	1.83677	0.25	PIAS1
GO:0048878	chemical homeostasis	Biological process	2	836	4	16119	9.64055	0.0150304	1	1.82303	0.5	LDLR//NCOR1
GO:0030521	androgen receptor signaling pathway	Biological process	1	62	4	16119	64.996	0.0152984	1	1.81535	0.25	PIAS1
GO:0044275	cellular carbohydrate catabolic process	Biological process	1	62	4	16119	64.996	0.0152984	1	1.81535	0.25	NCOR1
GO:2001252	positive regulation of chromosome organization	Biological process	1	62	4	16119	64.996	0.0152984	1	1.81535	0.25	NCOR1
GO:1901575	organic substance catabolic process	Biological process	3	2634	4	16119	4.58969	0.0153023	1	1.81524	0.75	LDLR//PIAS1//NCOR1
GO:0031401	positive regulation of protein modification process	Biological process	2	847	4	16119	9.51535	0.0154143	1	1.81208	0.5	NCOR1//PIAS1
GO:0006476	protein deacetylation	Biological process	1	64	4	16119	62.9648	0.015789	1	1.80165	0.25	NCOR1
GO:0015918	sterol transport	Biological process	1	64	4	16119	62.9648	0.015789	1	1.80165	0.25	LDLR
GO:0030301	cholesterol transport	Biological process	1	64	4	16119	62.9648	0.015789	1	1.80165	0.25	LDLR
GO:1901616	organic hydroxy compound catabolic process	Biological process	1	64	4	16119	62.9648	0.015789	1	1.80165	0.25	LDLR
GO:0014066	regulation of phosphatidylinositol 3-kinase signaling	Biological process	1	65	4	16119	61.9962	0.0160342	1	1.79495	0.25	NCOR1
GO:0046470	phosphatidylcholine metabolic process	Biological process	1	65	4	16119	61.9962	0.0160342	1	1.79495	0.25	LDLR
GO:0006096	glycolytic process	Biological process	1	67	4	16119	60.1455	0.0165245	1	1.78187	0.25	NCOR1
GO:0035601	protein deacylation	Biological process	1	67	4	16119	60.1455	0.0165245	1	1.78187	0.25	NCOR1
GO:0098732	macromolecule deacylation	Biological process	1	68	4	16119	59.261	0.0167696	1	1.77548	0.25	NCOR1
GO:0044255	cellular lipid metabolic process	Biological process	2	894	4	16119	9.0151	0.0171047	1	1.76688	0.5	LDLR//NCOR1
GO:0015908	fatty acid transport	Biological process	1	70	4	16119	57.5679	0.0172596	1	1.76297	0.25	NCOR1
GO:0015748	organophosphate ester transport	Biological process	1	72	4	16119	55.9688	0.0177494	1	1.75082	0.25	LDLR
GO:0022600	digestive system process	Biological process	1	72	4	16119	55.9688	0.0177494	1	1.75082	0.25	LDLR
GO:0043467	regulation of generation of precursor metabolites and energy	Biological process	1	73	4	16119	55.2021	0.0179942	1	1.74487	0.25	NCOR1
GO:0046632	alpha-beta T cell differentiation	Biological process	1	74	4	16119	54.4561	0.018239	1	1.739	0.25	NCOR1
GO:0045892	negative regulation of transcription, DNA-templated	Biological process	2	928	4	16119	8.68481	0.0183777	1	1.73571	0.5	PIAS1//NCOR1
GO:0060333	interferon-gamma-mediated signaling pathway	Biological process	1	75	4	16119	53.73	0.0184838	1	1.73321	0.25	PIAS1
GO:0032434	regulation of proteasomal ubiquitin-dependent protein catabolic process	Biological process	1	76	4	16119	53.023	0.0187285	1	1.7275	0.25	PIAS1
GO:1902679	negative regulation of RNA biosynthetic process	Biological process	2	947	4	16119	8.51056	0.0191073	1	1.7188	0.5	PIAS1//NCOR1
GO:0080134	regulation of response to stress	Biological process	2	949	4	16119	8.49262	0.0191848	1	1.71704	0.5	NCOR1//PIAS1
GO:0009056	catabolic process	Biological process	3	2865	4	16119	4.21963	0.0194522	1	1.71103	0.75	LDLR//PIAS1//NCOR1
GO:0032270	positive regulation of cellular protein metabolic process	Biological process	2	957	4	16119	8.42163	0.0194964	1	1.71004	0.5	NCOR1//PIAS1
GO:0001523	retinoid metabolic process	Biological process	1	80	4	16119	50.3719	0.0197069	1	1.70538	0.25	LDLR
GO:0032368	regulation of lipid transport	Biological process	1	81	4	16119	49.75	0.0199513	1	1.70003	0.25	NCOR1
GO:0033238	regulation of cellular amine metabolic process	Biological process	1	82	4	16119	49.1433	0.0201958	1	1.69474	0.25	LDLR
GO:0051253	negative regulation of RNA metabolic process	Biological process	2	979	4	16119	8.23238	0.0203652	1	1.69111	0.5	PIAS1//NCOR1
GO:0044070	regulation of anion transport	Biological process	1	84	4	16119	47.9732	0.0206845	1	1.68436	0.25	NCOR1
GO:0042439	ethanolamine-containing compound metabolic process	Biological process	1	85	4	16119	47.4088	0.0209288	1	1.67926	0.25	LDLR
GO:0014065	phosphatidylinositol 3-kinase signaling	Biological process	1	86	4	16119	46.8576	0.021173	1	1.67422	0.25	NCOR1
GO:0016101	diterpenoid metabolic process	Biological process	1	86	4	16119	46.8576	0.021173	1	1.67422	0.25	LDLR
GO:0040014	regulation of multicellular organism growth	Biological process	1	86	4	16119	46.8576	0.021173	1	1.67422	0.25	NCOR1
GO:0045862	positive regulation of proteolysis	Biological process	1	87	4	16119	46.319	0.0214172	1	1.66924	0.25	PIAS1
GO:0007051	spindle organization	Biological process	1	89	4	16119	45.2781	0.0219055	1	1.65945	0.25	NCOR1
GO:0007603	phototransduction, visible light	Biological process	1	92	4	16119	43.8016	0.0226376	1	1.64517	0.25	LDLR
GO:2000113	negative regulation of cellular macromolecule biosynthetic process	Biological process	2	1044	4	16119	7.71983	0.0230318	1	1.63767	0.5	PIAS1//NCOR1
GO:0001959	regulation of cytokine-mediated signaling pathway	Biological process	1	94	4	16119	42.8697	0.0231254	1	1.63591	0.25	PIAS1
GO:0006090	pyruvate metabolic process	Biological process	1	94	4	16119	42.8697	0.0231254	1	1.63591	0.25	NCOR1
GO:0009057	macromolecule catabolic process	Biological process	2	1047	4	16119	7.69771	0.0231584	1	1.63529	0.5	PIAS1//LDLR
GO:0010629	negative regulation of gene expression	Biological process	2	1050	4	16119	7.67571	0.0232854	1	1.63292	0.5	PIAS1//NCOR1
GO:0051247	positive regulation of protein metabolic process	Biological process	2	1051	4	16119	7.66841	0.0233278	1	1.63213	0.5	NCOR1//PIAS1
GO:0006721	terpenoid metabolic process	Biological process	1	95	4	16119	42.4184	0.0233692	1	1.63136	0.25	LDLR
GO:0061136	regulation of proteasomal protein catabolic process	Biological process	1	95	4	16119	42.4184	0.0233692	1	1.63136	0.25	PIAS1
GO:0031056	regulation of histone modification	Biological process	1	96	4	16119	41.9766	0.023613	1	1.62685	0.25	NCOR1
GO:0046631	alpha-beta T cell activation	Biological process	1	96	4	16119	41.9766	0.023613	1	1.62685	0.25	NCOR1
GO:0071346	cellular response to interferon-gamma	Biological process	1	98	4	16119	41.1199	0.0241005	1	1.61797	0.25	PIAS1
GO:0010954	positive regulation of protein processing	Biological process	1	99	4	16119	40.7045	0.0243441	1	1.61361	0.25	PIAS1
GO:0030218	erythrocyte differentiation	Biological process	1	99	4	16119	40.7045	0.0243441	1	1.61361	0.25	NCOR1
GO:1903319	positive regulation of protein maturation	Biological process	1	99	4	16119	40.7045	0.0243441	1	1.61361	0.25	PIAS1
GO:0045934	negative regulation of nucleobase-containing compound metabolic process	Biological process	2	1075	4	16119	7.49721	0.0243556	1	1.6134	0.5	PIAS1//NCOR1
GO:0042472	inner ear morphogenesis	Biological process	1	100	4	16119	40.2975	0.0245877	1	1.60928	0.25	SOBP
GO:0060759	regulation of response to cytokine stimulus	Biological process	1	100	4	16119	40.2975	0.0245877	1	1.60928	0.25	PIAS1
GO:1903308	regulation of chromatin modification	Biological process	1	101	4	16119	39.8985	0.0248313	1	1.605	0.25	NCOR1
GO:0010558	negative regulation of macromolecule biosynthetic process	Biological process	2	1092	4	16119	7.38049	0.0250956	1	1.6004	0.5	PIAS1//NCOR1
GO:0051172	negative regulation of nitrogen compound metabolic process	Biological process	2	1097	4	16119	7.34686	0.0253151	1	1.59662	0.5	PIAS1//NCOR1
GO:0045834	positive regulation of lipid metabolic process	Biological process	1	103	4	16119	39.1238	0.0253183	1	1.59657	0.25	LDLR
GO:0034101	erythrocyte homeostasis	Biological process	1	106	4	16119	38.0165	0.0260484	1	1.58422	0.25	NCOR1
GO:1902275	regulation of chromatin organization	Biological process	1	106	4	16119	38.0165	0.0260484	1	1.58422	0.25	NCOR1
GO:0006641	triglyceride metabolic process	Biological process	1	107	4	16119	37.6612	0.0262917	1	1.58018	0.25	LDLR
GO:0009584	detection of visible light	Biological process	1	107	4	16119	37.6612	0.0262917	1	1.58018	0.25	LDLR
GO:1903050	regulation of proteolysis involved in cellular protein catabolic process	Biological process	1	108	4	16119	37.3125	0.026535	1	1.57618	0.25	PIAS1
GO:0032501	multicellular organismal process	Biological process	4	6510	4	16119	2.47604	0.0265909	1	1.57527	1	NCOR1//PIAS1//SOBP//LDLR
GO:0007602	phototransduction	Biological process	1	110	4	16119	36.6341	0.0270213	1	1.56829	0.25	LDLR
GO:0045732	positive regulation of protein catabolic process	Biological process	1	112	4	16119	35.9799	0.0275075	1	1.56055	0.25	PIAS1
GO:0046890	regulation of lipid biosynthetic process	Biological process	1	112	4	16119	35.9799	0.0275075	1	1.56055	0.25	LDLR
GO:0031327	negative regulation of cellular biosynthetic process	Biological process	2	1146	4	16119	7.03272	0.0275118	1	1.56048	0.5	PIAS1//NCOR1
GO:0006639	acylglycerol metabolic process	Biological process	1	113	4	16119	35.6615	0.0277505	1	1.55673	0.25	LDLR
GO:0006638	neutral lipid metabolic process	Biological process	1	114	4	16119	35.3487	0.0279935	1	1.55294	0.25	LDLR
GO:1903362	regulation of cellular protein catabolic process	Biological process	1	114	4	16119	35.3487	0.0279935	1	1.55294	0.25	PIAS1
GO:0006720	isoprenoid metabolic process	Biological process	1	115	4	16119	35.0413	0.0282364	1	1.54919	0.25	LDLR
GO:0009890	negative regulation of biosynthetic process	Biological process	2	1162	4	16119	6.93589	0.0282467	1	1.54903	0.5	PIAS1//NCOR1
GO:0030518	intracellular steroid hormone receptor signaling pathway	Biological process	1	116	4	16119	34.7392	0.0284793	1	1.54547	0.25	PIAS1
GO:0051147	regulation of muscle cell differentiation	Biological process	1	117	4	16119	34.4423	0.0287221	1	1.54178	0.25	PIAS1
GO:0008203	cholesterol metabolic process	Biological process	1	118	4	16119	34.1504	0.0289649	1	1.53813	0.25	LDLR
GO:0021536	diencephalon development	Biological process	1	118	4	16119	34.1504	0.0289649	1	1.53813	0.25	NCOR1
GO:0034341	response to interferon-gamma	Biological process	1	118	4	16119	34.1504	0.0289649	1	1.53813	0.25	PIAS1
GO:0042157	lipoprotein metabolic process	Biological process	1	119	4	16119	33.8634	0.0292076	1	1.5345	0.25	LDLR
GO:0042471	ear morphogenesis	Biological process	1	120	4	16119	33.5812	0.0294503	1	1.53091	0.25	SOBP
GO:0002262	myeloid cell homeostasis	Biological process	1	122	4	16119	33.0307	0.0299356	1	1.52381	0.25	NCOR1
GO:0009583	detection of light stimulus	Biological process	1	122	4	16119	33.0307	0.0299356	1	1.52381	0.25	LDLR
GO:0043409	negative regulation of MAPK cascade	Biological process	1	124	4	16119	32.498	0.0304207	1	1.51683	0.25	NCOR1
GO:0031399	regulation of protein modification process	Biological process	2	1218	4	16119	6.617	0.0308862	1	1.51023	0.5	NCOR1//PIAS1
GO:0006629	lipid metabolic process	Biological process	2	1219	4	16119	6.61157	0.0309343	1	1.50956	0.5	LDLR//NCOR1
GO:0065003	macromolecular complex assembly	Biological process	2	1219	4	16119	6.61157	0.0309343	1	1.50956	0.5	NCOR1//PIAS1
GO:0065004	protein-DNA complex assembly	Biological process	1	127	4	16119	31.7303	0.031148	1	1.50657	0.25	PIAS1
GO:0006576	cellular biogenic amine metabolic process	Biological process	1	128	4	16119	31.4824	0.0313903	1	1.5032	0.25	LDLR
GO:0015718	monocarboxylic acid transport	Biological process	1	128	4	16119	31.4824	0.0313903	1	1.5032	0.25	NCOR1
GO:0016125	sterol metabolic process	Biological process	1	130	4	16119	30.9981	0.0318748	1	1.49655	0.25	LDLR
GO:0007259	JAK-STAT cascade	Biological process	1	132	4	16119	30.5284	0.0323592	1	1.49	0.25	PIAS1
GO:0007586	digestion	Biological process	1	134	4	16119	30.0728	0.0328433	1	1.48355	0.25	LDLR
GO:0007605	sensory perception of sound	Biological process	1	135	4	16119	29.85	0.0330854	1	1.48036	0.25	SOBP
GO:0010675	regulation of cellular carbohydrate metabolic process	Biological process	1	136	4	16119	29.6305	0.0333273	1	1.4772	0.25	NCOR1
GO:0033044	regulation of chromosome organization	Biological process	1	136	4	16119	29.6305	0.0333273	1	1.4772	0.25	NCOR1
GO:0044724	single-organism carbohydrate catabolic process	Biological process	1	139	4	16119	28.991	0.034053	1	1.46785	0.25	NCOR1
GO:0006109	regulation of carbohydrate metabolic process	Biological process	1	144	4	16119	27.9844	0.0352615	1	1.4527	0.25	NCOR1
GO:0042592	homeostatic process	Biological process	2	1308	4	16119	6.1617	0.0353446	1	1.45168	0.5	LDLR//NCOR1
GO:0046328	regulation of JNK cascade	Biological process	1	145	4	16119	27.7914	0.035503	1	1.44973	0.25	NCOR1
GO:0016052	carbohydrate catabolic process	Biological process	1	147	4	16119	27.4133	0.035986	1	1.44387	0.25	NCOR1
GO:0050954	sensory perception of mechanical stimulus	Biological process	1	147	4	16119	27.4133	0.035986	1	1.44387	0.25	SOBP
GO:0007623	circadian rhythm	Biological process	1	150	4	16119	26.865	0.0367102	1	1.43521	0.25	NCOR1
GO:0071824	protein-DNA complex subunit organization	Biological process	1	150	4	16119	26.865	0.0367102	1	1.43521	0.25	PIAS1
GO:0044242	cellular lipid catabolic process	Biological process	1	152	4	16119	26.5115	0.0371927	1	1.42954	0.25	LDLR
GO:0031331	positive regulation of cellular catabolic process	Biological process	1	153	4	16119	26.3382	0.0374339	1	1.42674	0.25	PIAS1
GO:0035264	multicellular organism growth	Biological process	1	156	4	16119	25.8317	0.0381572	1	1.41842	0.25	NCOR1
GO:1903322	positive regulation of protein modification by small protein conjugation or removal	Biological process	1	158	4	16119	25.5047	0.0386392	1	1.41297	0.25	PIAS1
GO:0006811	ion transport	Biological process	2	1386	4	16119	5.81494	0.0394193	1	1.40429	0.5	LDLR//NCOR1
GO:0007219	Notch signaling pathway	Biological process	1	163	4	16119	24.7224	0.0398434	1	1.39964	0.25	NCOR1
GO:0032872	regulation of stress-activated MAPK cascade	Biological process	1	166	4	16119	24.2756	0.0405654	1	1.39184	0.25	NCOR1
GO:0070302	regulation of stress-activated protein kinase signaling cascade	Biological process	1	167	4	16119	24.1302	0.0408059	1	1.38928	0.25	NCOR1
GO:0015850	organic hydroxy compound transport	Biological process	1	170	4	16119	23.7044	0.0415273	1	1.38167	0.25	LDLR
GO:0009581	detection of external stimulus	Biological process	1	171	4	16119	23.5658	0.0417677	1	1.37916	0.25	LDLR
GO:0048522	positive regulation of cellular process	Biological process	3	3770	4	16119	3.2067	0.0421791	1	1.3749	0.75	LDLR//PIAS1//NCOR1
GO:0009582	detection of abiotic stimulus	Biological process	1	174	4	16119	23.1595	0.0424886	1	1.37173	0.25	LDLR
GO:0048839	inner ear development	Biological process	1	176	4	16119	22.8963	0.042969	1	1.36685	0.25	SOBP
GO:0031328	positive regulation of cellular biosynthetic process	Biological process	2	1454	4	16119	5.54298	0.0431273	1	1.36525	0.5	LDLR//PIAS1
GO:0007254	JNK cascade	Biological process	1	179	4	16119	22.5126	0.0436892	1	1.35963	0.25	NCOR1
GO:0009891	positive regulation of biosynthetic process	Biological process	2	1477	4	16119	5.45667	0.0444137	1	1.35248	0.5	LDLR//PIAS1
GO:0031326	regulation of cellular biosynthetic process	Biological process	3	3844	4	16119	3.14497	0.0445259	1	1.35139	0.75	PIAS1//NCOR1//LDLR
GO:0007626	locomotory behavior	Biological process	1	186	4	16119	21.6653	0.0453681	1	1.34325	0.25	SOBP
GO:0030217	T cell differentiation	Biological process	1	186	4	16119	21.6653	0.0453681	1	1.34325	0.25	NCOR1
GO:0009889	regulation of biosynthetic process	Biological process	3	3889	4	16119	3.10858	0.0459908	1	1.33733	0.75	PIAS1//NCOR1//LDLR
GO:0048015	phosphatidylinositol-mediated signaling	Biological process	1	190	4	16119	21.2092	0.0463264	1	1.33417	0.25	NCOR1
GO:0048017	inositol lipid-mediated signaling	Biological process	1	190	4	16119	21.2092	0.0463264	1	1.33417	0.25	NCOR1
GO:0007179	transforming growth factor beta receptor signaling pathway	Biological process	1	191	4	16119	21.0982	0.0465659	1	1.33193	0.25	NCOR1
GO:0006357	regulation of transcription from RNA polymerase II promoter	Biological process	2	1519	4	16119	5.30579	0.0468042	1	1.32972	0.5	PIAS1//NCOR1
GO:0070613	regulation of protein processing	Biological process	1	194	4	16119	20.7719	0.0472841	1	1.32528	0.25	PIAS1
GO:1903317	regulation of protein maturation	Biological process	1	194	4	16119	20.7719	0.0472841	1	1.32528	0.25	PIAS1
GO:0032268	regulation of cellular protein metabolic process	Biological process	2	1543	4	16119	5.22327	0.048194	1	1.31701	0.5	NCOR1//PIAS1
GO:0006367	transcription initiation from RNA polymerase II promoter	Biological process	1	199	4	16119	20.25	0.0484802	1	1.31444	0.25	NCOR1
GO:0006898	receptor-mediated endocytosis	Biological process	1	199	4	16119	20.25	0.0484802	1	1.31444	0.25	LDLR
GO:0044106	cellular amine metabolic process	Biological process	1	199	4	16119	20.25	0.0484802	1	1.31444	0.25	LDLR
GO:0043583	ear development	Biological process	1	201	4	16119	20.0485	0.0489583	1	1.31017	0.25	SOBP
GO:0009896	positive regulation of catabolic process	Biological process	1	204	4	16119	19.7537	0.0496751	1	1.30386	0.25	PIAS1

## Sheet: MF
#Column "GO.ID" stands for the ID of gene ontology term
#Column "Term" stands for the name of gene ontology term
#Column "Ontology" stands for the ontology of GOID belongs to
#Column "Count" stands for the number of DE genes associated with the listed GOID
#Column "Pop.Hits" stands for the number of background population genes associated with the listed GOID
#Column "List.Total" stands for the total number of DE genes
#Column "Pop.Total" stands for the total number of background population genes
#Column "Fold.Enrichment" stands for the Fold Enrichment value of the GOID, it equals (Count/Pop.Hits)/(List.Total/Pop.Total)
#Column "Pvalue" stands for the significance testing value of the GOID
#Column "FDR" stands for the false discovery rate of the GOID, using Benjamini & Hochberg (1995) method
#Column "Enrichment.Score" stands for the Enrichment Score value of the GOID, it equals (-log10(Pvalue))
#Column "Gene.Ratio" stands for the Gene Ratio value genes associated with the GOID, it equals (Count/List.Total)
#Column "GENES" stands for the DE genes associated with the GOID
GO.ID	Term	Ontology	Count	Pop.Hits	List.Total	Pop.Total	Fold.Enrichment	Pvalue	FDR	Enrichment.Score	Gene.Ratio	GENES
GO:0035257	nuclear hormone receptor binding	Molecular function	2	132	4	15711	59.5114	0.000415731	0.289662	3.38119	0.5	NCOR1//PIAS1
GO:0051427	hormone receptor binding	Molecular function	2	153	4	15711	51.3431	0.000558116	0.289662	3.25328	0.5	NCOR1//PIAS1
GO:0003714	transcription corepressor activity	Molecular function	2	204	4	15711	38.5074	0.000989517	0.342373	3.00458	0.5	PIAS1//NCOR1
GO:0005041	low-density lipoprotein receptor activity	Molecular function	1	10	4	15711	392.775	0.0025438	0.439867	2.59452	0.25	LDLR
GO:0019789	SUMO ligase activity	Molecular function	1	10	4	15711	392.775	0.0025438	0.439867	2.59452	0.25	PIAS1
GO:0032183	SUMO binding	Molecular function	1	12	4	15711	327.312	0.00305198	0.439867	2.51542	0.25	SOBP
GO:0030228	lipoprotein particle receptor activity	Molecular function	1	14	4	15711	280.554	0.00355996	0.439867	2.44855	0.25	LDLR
GO:0030169	low-density lipoprotein particle binding	Molecular function	1	15	4	15711	261.85	0.00381388	0.439867	2.41863	0.25	LDLR
GO:0046965	retinoid X receptor binding	Molecular function	1	15	4	15711	261.85	0.00381388	0.439867	2.41863	0.25	NCOR1
GO:0003712	transcription cofactor activity	Molecular function	2	502	4	15711	15.6484	0.00585745	0.444856	2.23229	0.5	PIAS1//NCOR1
GO:0071813	lipoprotein particle binding	Molecular function	1	24	4	15711	163.656	0.00609696	0.444856	2.21489	0.25	LDLR
GO:0071814	protein-lipid complex binding	Molecular function	1	24	4	15711	163.656	0.00609696	0.444856	2.21489	0.25	LDLR
GO:0019787	small conjugating protein ligase activity	Molecular function	1	26	4	15711	151.067	0.00660378	0.444856	2.18021	0.25	PIAS1
GO:0000989	transcription factor binding transcription factor activity	Molecular function	2	534	4	15711	14.7107	0.00661048	0.444856	2.17977	0.5	PIAS1//NCOR1
GO:0000988	protein binding transcription factor activity	Molecular function	2	538	4	15711	14.6013	0.00670765	0.444856	2.17343	0.5	PIAS1//NCOR1
GO:0046966	thyroid hormone receptor binding	Molecular function	1	27	4	15711	145.472	0.00685712	0.444856	2.16386	0.25	NCOR1
GO:0001102	RNA polymerase II activating transcription factor binding	Molecular function	1	36	4	15711	109.104	0.00913497	0.554297	2.03929	0.25	NCOR1
GO:0050681	androgen receptor binding	Molecular function	1	38	4	15711	103.362	0.00964062	0.554297	2.01589	0.25	PIAS1
GO:0042974	retinoic acid receptor binding	Molecular function	1	40	4	15711	98.1937	0.0101461	0.554297	1.9937	0.25	NCOR1
GO:0033613	activating transcription factor binding	Molecular function	1	53	4	15711	74.1085	0.0134269	0.696855	1.87202	0.25	NCOR1
GO:0038024	cargo receptor activity	Molecular function	1	62	4	15711	63.3508	0.0156934	0.775703	1.80428	0.25	LDLR
GO:0035258	steroid hormone receptor binding	Molecular function	1	66	4	15711	59.5114	0.0166995	0.787913	1.7773	0.25	PIAS1
GO:0042826	histone deacetylase binding	Molecular function	1	74	4	15711	53.0777	0.0187094	0.839317	1.72794	0.25	NCOR1
GO:0016881	acid-amino acid ligase activity	Molecular function	1	77	4	15711	51.0097	0.0194623	0.839317	1.71081	0.25	PIAS1
GO:0001948	glycoprotein binding	Molecular function	1	80	4	15711	49.0969	0.0202148	0.839317	1.69433	0.25	LDLR
GO:0032182	small conjugating protein binding	Molecular function	1	84	4	15711	46.7589	0.0212174	0.847064	1.67331	0.25	SOBP
GO:0001085	RNA polymerase II transcription factor binding	Molecular function	1	89	4	15711	44.132	0.0224696	0.863831	1.6484	0.25	NCOR1
GO:0016879	ligase activity, forming carbon-nitrogen bonds	Molecular function	1	111	4	15711	35.3851	0.027965	1	1.55339	0.25	PIAS1
GO:0005102	receptor binding	Molecular function	2	1288	4	15711	6.09899	0.0360329	1	1.4433	0.5	NCOR1//PIAS1
GO:0019899	enzyme binding	Molecular function	2	1354	4	15711	5.8017	0.039588	1	1.40244	0.5	PIAS1//NCOR1
GO:0031625	ubiquitin protein ligase binding	Molecular function	1	180	4	15711	21.8208	0.0450504	1	1.3463	0.25	PIAS1
GO:0044389	small conjugating protein ligase binding	Molecular function	1	180	4	15711	21.8208	0.0450504	1	1.3463	0.25	PIAS1

## Sheet: CC
#Column "GO.ID" stands for the ID of gene ontology term
#Column "Term" stands for the name of gene ontology term
#Column "Ontology" stands for the ontology of GOID belongs to
#Column "Count" stands for the number of DE genes associated with the listed GOID
#Column "Pop.Hits" stands for the number of background population genes associated with the listed GOID
#Column "List.Total" stands for the total number of DE genes
#Column "Pop.Total" stands for the total number of background population genes
#Column "Fold.Enrichment" stands for the Fold Enrichment value of the GOID, it equals (Count/Pop.Hits)/(List.Total/Pop.Total)
#Column "Pvalue" stands for the significance testing value of the GOID
#Column "FDR" stands for the false discovery rate of the GOID, using Benjamini & Hochberg (1995) method
#Column "Enrichment.Score" stands for the Enrichment Score value of the GOID, it equals (-log10(Pvalue))
#Column "Gene.Ratio" stands for the Gene Ratio value genes associated with the GOID, it equals (Count/List.Total)
#Column "GENES" stands for the DE genes associated with the GOID
GO.ID	Term	Ontology	Count	Pop.Hits	List.Total	Pop.Total	Fold.Enrichment	Pvalue	FDR	Enrichment.Score	Gene.Ratio	GENES
GO:0016580	Sin3 complex	Cellular component	1	12	3	17280	480	0.00208201	0.496935	2.68152	0.333333	NCOR1
GO:0070822	Sin3-type complex	Cellular component	1	12	3	17280	480	0.00208201	0.496935	2.68152	0.333333	NCOR1
GO:0034362	low-density lipoprotein particle	Cellular component	1	13	3	17280	443.077	0.00225538	0.496935	2.64678	0.333333	LDLR
GO:0044451	nucleoplasm part	Cellular component	2	643	3	17280	17.916	0.00404509	0.559639	2.39307	0.666667	NCOR1//PIAS1
GO:0030669	clathrin-coated endocytic vesicle membrane	Cellular component	1	37	3	17280	155.676	0.00641024	0.559639	2.19313	0.333333	LDLR
GO:0034358	plasma lipoprotein particle	Cellular component	1	37	3	17280	155.676	0.00641024	0.559639	2.19313	0.333333	LDLR
GO:0032994	protein-lipid complex	Cellular component	1	39	3	17280	147.692	0.00675595	0.559639	2.17031	0.333333	LDLR
GO:0045334	clathrin-coated endocytic vesicle	Cellular component	1	43	3	17280	133.953	0.00744715	0.559639	2.12801	0.333333	LDLR
GO:0005876	spindle microtubule	Cellular component	1	44	3	17280	130.909	0.00761989	0.559639	2.11805	0.333333	NCOR1
GO:0000118	histone deacetylase complex	Cellular component	1	49	3	17280	117.551	0.00848333	0.560748	2.07143	0.333333	NCOR1
GO:0005905	coated pit	Cellular component	1	62	3	17280	92.9032	0.0107259	0.641723	1.96956	0.333333	LDLR
GO:0017053	transcriptional repressor complex	Cellular component	1	69	3	17280	83.4783	0.0119321	0.641723	1.92328	0.333333	NCOR1
GO:0030665	clathrin-coated vesicle membrane	Cellular component	1	73	3	17280	78.9041	0.0126209	0.641723	1.89891	0.333333	LDLR
GO:0016605	PML body	Cellular component	1	91	3	17280	63.2967	0.0157165	0.742042	1.80365	0.333333	PIAS1
GO:0030662	coated vesicle membrane	Cellular component	1	114	3	17280	50.5263	0.0196625	0.810066	1.70636	0.333333	LDLR
GO:0005654	nucleoplasm	Cellular component	2	1451	3	17280	7.93935	0.0199576	0.810066	1.69989	0.666667	NCOR1//PIAS1
GO:0030136	clathrin-coated vesicle	Cellular component	1	122	3	17280	47.2131	0.0210326	0.810066	1.67711	0.333333	LDLR
GO:0030666	endocytic vesicle membrane	Cellular component	1	128	3	17280	45	0.0220593	0.810066	1.65641	0.333333	LDLR
GO:0030135	coated vesicle	Cellular component	1	174	3	17280	33.1034	0.0299069	0.994045	1.52423	0.333333	LDLR
GO:0016607	nuclear speck	Cellular component	1	175	3	17280	32.9143	0.030077	0.994045	1.52177	0.333333	PIAS1
GO:0005770	late endosome	Cellular component	1	184	3	17280	31.3043	0.0316073	0.994878	1.50021	0.333333	LDLR
GO:0000790	nuclear chromatin	Cellular component	1	210	3	17280	27.4286	0.0360191	1	1.44347	0.333333	NCOR1
GO:0030139	endocytic vesicle	Cellular component	1	214	3	17280	26.9159	0.0366967	1	1.43537	0.333333	LDLR
GO:0009897	external side of plasma membrane	Cellular component	1	222	3	17280	25.9459	0.0380508	1	1.41964	0.333333	LDLR
GO:0005769	early endosome	Cellular component	1	228	3	17280	25.2632	0.0390656	1	1.40821	0.333333	LDLR
GO:0031981	nuclear lumen	Cellular component	2	2155	3	17280	5.34571	0.0427648	1	1.36891	0.666667	PIAS1//NCOR1
GO:0005667	transcription factor complex	Cellular component	1	258	3	17280	22.3256	0.0441287	1	1.35528	0.333333	NCOR1
GO:0005819	spindle	Cellular component	1	262	3	17280	21.9847	0.0448025	1	1.3487	0.333333	NCOR1
GO:0043235	receptor complex	Cellular component	1	272	3	17280	21.1765	0.0464855	1	1.33268	0.333333	LDLR
