# Supplementary material for: Depletion of exosomal circLDLR in follicle fluid derepresses miR-1294 function and inhibits estradiol production via CYP19A1 in polycystic ovary syndrome
Source: Aging (Albany NY). 2020 Jul 10;12(15):15414–35. doi: 10.18632/aging.103602 (PMC7467373; doi:10.18632/aging.103602)
Supplement: Supplementary Table 4 [file aging-12-103602-s002..xls]

## Sheet: KEGG
#Column "PathwayID" stands for Pathway identifiers used in KEGG
#Column "Definition" stands for the definition of the PathwayID
#Column "OriginalWebSite"stands for The map's website,the nodes with red frame and red symbol are associated with the DE genes, green nodes have no significance
#Column "p-value"
"Fisher-Pvalue" stands for the enrichment p-value of the PathwayID used Fisher's exact test
#Column "SelectionCounts" stands for the Count of the DE genes' entities directly associated with the listed PathwayID
#Column "SelectionSize" stands for the total number of the DE genes' entities
#Column "Count" stands for the count of the chosen background population genes' entities associated with the listed PathwayID
#Column "Size" stands for the total number of chosen background population genes' entities
#Column "FDR" stands for the false discovery rate of the PathwayID
#Column "Enrichment_Score" stands for the Enrichment Score value of the PathwayID, it equals "-log10(Pvalue)"
#Column "GeneRatio" stands for the Gene Ratio value of the PathwayID, it equals "SelectionCounts/SelectionSize"
#Column "GENES" stands for the DE genes associated with the PathwayID
PathwayID	Definition	OriginalWebSite	Fisher-Pvalue	SelectionCounts	SelectionSize	Count	Size	FDR	Enrichment_Score	GeneRatio	Genes
hsa05160	Hepatitis C	http://www.genome.jp/kegg-bin/show_pathway?hsa05160+3949+8554	0.00106462	2	3	133	6990	0.319385	2.97281	0.666667	LDLR//PIAS1
hsa04913	Ovarian steroidogenesis	http://www.genome.jp/kegg-bin/show_pathway?hsa04913+3949	0.0213091	1	3	50	6990	1	1.67143	0.333333	LDLR
hsa04976	Bile secretion	http://www.genome.jp/kegg-bin/show_pathway?hsa04976+3949	0.0301679	1	3	71	6990	1	1.52046	0.333333	LDLR
hsa04925	Aldosterone synthesis and secretion	http://www.genome.jp/kegg-bin/show_pathway?hsa04925+3949	0.0343675	1	3	81	6990	1	1.46385	0.333333	LDLR
hsa04919	Thyroid hormone signaling pathway	http://www.genome.jp/kegg-bin/show_pathway?hsa04919+9611	0.0498007	1	3	118	6990	1	1.30276	0.333333	NCOR1
hsa05145	Toxoplasmosis	http://www.genome.jp/kegg-bin/show_pathway?hsa05145+3949	0.0498007	1	3	118	6990	1	1.30276	0.333333	LDLR
hsa04120	Ubiquitin mediated proteolysis	http://www.genome.jp/kegg-bin/show_pathway?hsa04120+8554	0.0576615	1	3	137	6990	1	1.23911	0.333333	PIAS1
hsa04630	Jak-STAT signaling pathway	http://www.genome.jp/kegg-bin/show_pathway?hsa04630+8554	0.0662992	1	3	158	6990	1	1.17849	0.333333	PIAS1
hsa05202	Transcriptional misregulation in cancer	http://www.genome.jp/kegg-bin/show_pathway?hsa05202+9611	0.0752914	1	3	180	6990	1	1.12325	0.333333	NCOR1
hsa04144	Endocytosis	http://www.genome.jp/kegg-bin/show_pathway?hsa04144+3949	0.107106	1	3	259	6990	1	0.970188	0.333333	LDLR
