# Supplementary material for: Depletion of exosomal circLDLR in follicle fluid derepresses miR-1294 function and inhibits estradiol production via CYP19A1 in polycystic ovary syndrome
Source: Aging (Albany NY). 2020 Jul 10;12(15):15414–35. doi: 10.18632/aging.103602 (PMC7467373; doi:10.18632/aging.103602)
Supplement: Supplementary Table 5 [file aging-12-103602-s004..xlsx]

## Sheet: prediction 
miRNAs binded hsa_circ_0006877（circLDLR) summary of binding sites between miRNA and target. Total: the number of binding sites. context+ score & context score: The context+ score & context score from TargetScan. Structure Score & Free Energy: The thermodynamic properties of the binding site from miRanda.
miRNA	Seqname	GeneSymbol	Type	Total	Context+	Context	Structure	Energy	UTR Length
hsa-miR-1294	chr19:11230768-11231198+	chr19:11230768-11231198+	circRNA	3	-0.306	-0.215	293	-40.96	315
hsa-miR-1827	chr19:11230768-11231198+	chr19:11230768-11231198+	circRNA	2	-0.207	-0.048	302	-53.65	315
hsa-miR-326	chr19:11230768-11231198+	chr19:11230768-11231198+	circRNA	1	-0.163	-0.126	140	-18.08	315
hsa-miR-330-5p	chr19:11230768-11231198+	chr19:11230768-11231198+	circRNA	1	-0.182	-0.157	145	-18.54	315
hsa-miR-486-3p	chr19:11230768-11231198+	chr19:11230768-11231198+	circRNA	1	-0.192	-0.134	155	-29.14	315
hsa-miR-649	chr19:11230768-11231198+	chr19:11230768-11231198+	circRNA	1	-0.085	-0.066	145	-12.95	315
hsa-miR-4701-3p	chr19:11230768-11231198+	chr19:11230768-11231198+	circRNA	2	-0.175	-0.167	307	-46.49	315
hsa-miR-4763-3p	chr19:11230768-11231198+	chr19:11230768-11231198+	circRNA	2	-0.191	-0.103	298	-70.44	315
hsa-miR-6721-5p	chr19:11230768-11231198+	chr19:11230768-11231198+	circRNA	2	-0.241	-0.069	297	-46.48	315
hsa-miR-3909	chr19:11230768-11231198+	chr19:11230768-11231198+	circRNA	2	-0.129	-0.115	295	-39.65	315
hsa-miR-1228-5p	chr19:11230768-11231198+	chr19:11230768-11231198+	circRNA	2	-0.216	-0.025	282	-54.1	315
hsa-miR-6879-5p	chr19:11230768-11231198+	chr19:11230768-11231198+	circRNA	2		0.058	281	-51.02	315
hsa-miR-1262	chr19:11230768-11231198+	chr19:11230768-11231198+	circRNA	1	-0.147	-0.12	172	-21.61	315
hsa-miR-6775-5p	chr19:11230768-11231198+	chr19:11230768-11231198+	circRNA	1	-0.253	-0.114	170	-35.67	315
hsa-miR-8089	chr19:11230768-11231198+	chr19:11230768-11231198+	circRNA	1	-0.374	-0.294	169	-29.43	315
hsa-miR-1207-5p	chr19:11230768-11231198+	chr19:11230768-11231198+	circRNA	1	-0.182	-0.123	165	-27.53	315
hsa-miR-589-5p	chr19:11230768-11231198+	chr19:11230768-11231198+	circRNA	1	-0.241	-0.258	165	-21.79	315
hsa-miR-6086	chr19:11230768-11231198+	chr19:11230768-11231198+	circRNA	1	-0.337	-0.291	164	-25.22	315
hsa-miR-5589-5p	chr19:11230768-11231198+	chr19:11230768-11231198+	circRNA	1	-0.217	-0.215	163	-25.48	315
hsa-miR-6729-5p	chr19:11230768-11231198+	chr19:11230768-11231198+	circRNA	1	-0.542	-0.291	162	-28.12	315
hsa-miR-3190-5p	chr19:11230768-11231198+	chr19:11230768-11231198+	circRNA	1	-0.128	-0.068	162	-26.6	315
hsa-miR-6765-5p	chr19:11230768-11231198+	chr19:11230768-11231198+	circRNA	1	-0.23	-0.163	161	-31.98	315
hsa-miR-5090	chr19:11230768-11231198+	chr19:11230768-11231198+	circRNA	1	-0.253	-0.114	160	-28.38	315
hsa-miR-4649-5p	chr19:11230768-11231198+	chr19:11230768-11231198+	circRNA	1	-0.532	-0.289	158	-28.91	315
hsa-miR-4667-5p	chr19:11230768-11231198+	chr19:11230768-11231198+	circRNA	1	-0.395	-0.298	158	-24.05	315
hsa-miR-744-5p	chr19:11230768-11231198+	chr19:11230768-11231198+	circRNA	1	-0.576	-0.281	156	-32.2	315
hsa-miR-6810-5p	chr19:11230768-11231198+	chr19:11230768-11231198+	circRNA	1	-0.246	-0.201	156	-26.71	315
hsa-miR-4645-3p	chr19:11230768-11231198+	chr19:11230768-11231198+	circRNA	1	-0.111	-0.126	156	-16.83	315
hsa-miR-6803-5p	chr19:11230768-11231198+	chr19:11230768-11231198+	circRNA	1	-0.203	-0.136	155	-27.91	315
hsa-miR-6774-5p	chr19:11230768-11231198+	chr19:11230768-11231198+	circRNA	1	-0.199	-0.161	155	-23.75	315
hsa-miR-4756-5p	chr19:11230768-11231198+	chr19:11230768-11231198+	circRNA	1	-0.103	-0.045	154	-27.53	315
hsa-miR-323a-5p	chr19:11230768-11231198+	chr19:11230768-11231198+	circRNA	1	-0.167	-0.096	154	-27.14	315
hsa-miR-96-5p	chr19:11230768-11231198+	chr19:11230768-11231198+	circRNA	1	-0.177	-0.166	154	-14.3	315
hsa-miR-6754-5p	chr19:11230768-11231198+	chr19:11230768-11231198+	circRNA	1	-0.075	-0.032	153	-28.37	315
hsa-miR-6776-5p	chr19:11230768-11231198+	chr19:11230768-11231198+	circRNA	1	-0.171	-0.14	153	-19.88	315
hsa-miR-6735-5p	chr19:11230768-11231198+	chr19:11230768-11231198+	circRNA	1		0.018	152	-32.14	315
hsa-miR-4734	chr19:11230768-11231198+	chr19:11230768-11231198+	circRNA	1	-0.471	-0.213	152	-26.81	315
hsa-miR-146a-5p	chr19:11230768-11231198+	chr19:11230768-11231198+	circRNA	1	-0.037	-0.025	152	-20.73	315
hsa-miR-135a-5p	chr19:11230768-11231198+	chr19:11230768-11231198+	circRNA	1	-0.156	-0.169	152	-12.11	315
hsa-miR-3187-5p	chr19:11230768-11231198+	chr19:11230768-11231198+	circRNA	1			151	-25.52	315
hsa-miR-103a-3p	chr19:11230768-11231198+	chr19:11230768-11231198+	circRNA	1	-0.09	-0.071	151	-22.58	315
hsa-miR-107	chr19:11230768-11231198+	chr19:11230768-11231198+	circRNA	1	-0.09	-0.071	151	-22.33	315
hsa-miR-4472	chr19:11230768-11231198+	chr19:11230768-11231198+	circRNA	1	-0.216	-0.13	151	-19.52	315
hsa-miR-4270	chr19:11230768-11231198+	chr19:11230768-11231198+	circRNA	1	-0.066	-0.016	151	-19.21	315
hsa-miR-4447	chr19:11230768-11231198+	chr19:11230768-11231198+	circRNA	1	-0.216	-0.13	151	-18.99	315
hsa-miR-30e-3p	chr19:11230768-11231198+	chr19:11230768-11231198+	circRNA	1	-0.018	-0.066	151	-16.84	315
hsa-miR-6736-5p	chr19:11230768-11231198+	chr19:11230768-11231198+	circRNA	1	-0.12	-0.074	150	-29.96	315
hsa-miR-497-5p	chr19:11230768-11231198+	chr19:11230768-11231198+	circRNA	1	-0.113	-0.09	150	-21.66	315
hsa-miR-342-3p	chr19:11230768-11231198+	chr19:11230768-11231198+	circRNA	1	-0.252	-0.214	150	-21.06	315
hsa-miR-3934-3p	chr19:11230768-11231198+	chr19:11230768-11231198+	circRNA	1	-0.311	-0.238	150	-18.91	315
hsa-miR-483-3p	chr19:11230768-11231198+	chr19:11230768-11231198+	circRNA	1	-0.306	-0.259	150	-18.41	315
hsa-miR-1296-3p	chr19:11230768-11231198+	chr19:11230768-11231198+	circRNA	1	-0.155	-0.081	150	-17.88	315
hsa-miR-6833-5p	chr19:11230768-11231198+	chr19:11230768-11231198+	circRNA	1	-0.233	-0.237	150	-16.62	315
hsa-miR-6756-5p	chr19:11230768-11231198+	chr19:11230768-11231198+	circRNA	1			149	-30.25	315
hsa-miR-7111-3p	chr19:11230768-11231198+	chr19:11230768-11231198+	circRNA	1	-0.116	-0.109	149	-23.22	315
hsa-miR-4483	chr19:11230768-11231198+	chr19:11230768-11231198+	circRNA	1	-0.144	-0.072	149	-18.49	315
hsa-miR-3157-5p	chr19:11230768-11231198+	chr19:11230768-11231198+	circRNA	1	-0.445	-0.387	149	-17.71	315
hsa-miR-612	chr19:11230768-11231198+	chr19:11230768-11231198+	circRNA	1			148	-27.59	315
hsa-miR-4739	chr19:11230768-11231198+	chr19:11230768-11231198+	circRNA	1	-0.103	-0.045	148	-24.88	315
hsa-miR-4538	chr19:11230768-11231198+	chr19:11230768-11231198+	circRNA	1			148	-24.07	315
hsa-miR-30c-1-3p	chr19:11230768-11231198+	chr19:11230768-11231198+	circRNA	1			148	-21.8	315
hsa-miR-6751-5p	chr19:11230768-11231198+	chr19:11230768-11231198+	circRNA	1	-0.193	-0.121	148	-21.04	315
hsa-miR-4441	chr19:11230768-11231198+	chr19:11230768-11231198+	circRNA	1	-0.084	-0.047	148	-18.96	315
hsa-miR-1321	chr19:11230768-11231198+	chr19:11230768-11231198+	circRNA	1	-0.093	-0.03	148	-18.93	315
hsa-miR-328-5p	chr19:11230768-11231198+	chr19:11230768-11231198+	circRNA	1			147	-37.82	315
hsa-miR-6743-5p	chr19:11230768-11231198+	chr19:11230768-11231198+	circRNA	1		0.023	147	-27.66	315
hsa-miR-4745-5p	chr19:11230768-11231198+	chr19:11230768-11231198+	circRNA	1	-0.11	-0.033	147	-25.41	315
hsa-miR-133b	chr19:11230768-11231198+	chr19:11230768-11231198+	circRNA	1	-0.043	0.005	147	-22.04	315
hsa-miR-133a-3p	chr19:11230768-11231198+	chr19:11230768-11231198+	circRNA	1	-0.043	0.005	147	-22.04	315
hsa-miR-3190-3p	chr19:11230768-11231198+	chr19:11230768-11231198+	circRNA	1	-0.31	-0.338	147	-20.07	315
hsa-miR-488-5p	chr19:11230768-11231198+	chr19:11230768-11231198+	circRNA	1		0.026	147	-19.62	315
hsa-miR-4505	chr19:11230768-11231198+	chr19:11230768-11231198+	circRNA	1	-0.437	-0.343	147	-19.52	315
hsa-miR-6077	chr19:11230768-11231198+	chr19:11230768-11231198+	circRNA	1	-0.296	-0.347	147	-18.02	315
hsa-miR-30a-3p	chr19:11230768-11231198+	chr19:11230768-11231198+	circRNA	1	-0.018	-0.066	147	-16.05	315
hsa-miR-329-5p	chr19:11230768-11231198+	chr19:11230768-11231198+	circRNA	1	-0.123	-0.245	147	-13.09	315
hsa-miR-1229-5p	chr19:11230768-11231198+	chr19:11230768-11231198+	circRNA	1			146	-34.08	315
hsa-miR-203a-5p	chr19:11230768-11231198+	chr19:11230768-11231198+	circRNA	1			146	-22.63	315
hsa-miR-1293	chr19:11230768-11231198+	chr19:11230768-11231198+	circRNA	1	-0.144	-0.072	146	-20.22	315
hsa-miR-4435	chr19:11230768-11231198+	chr19:11230768-11231198+	circRNA	1	-0.124	-0.058	146	-17.92	315
hsa-miR-489-3p	chr19:11230768-11231198+	chr19:11230768-11231198+	circRNA	1	-0.238	-0.254	146	-16.24	315
hsa-miR-5582-5p	chr19:11230768-11231198+	chr19:11230768-11231198+	circRNA	1	-0.085	-0.037	146	-14.22	315
hsa-miR-30d-3p	chr19:11230768-11231198+	chr19:11230768-11231198+	circRNA	1	-0.018	-0.066	146	-14.19	315
hsa-miR-3170	chr19:11230768-11231198+	chr19:11230768-11231198+	circRNA	1			146	-12.56	315
hsa-miR-135b-5p	chr19:11230768-11231198+	chr19:11230768-11231198+	circRNA	1	-0.156	-0.169	146	-12.11	315
hsa-miR-6893-5p	chr19:11230768-11231198+	chr19:11230768-11231198+	circRNA	1		0.031	145	-27.73	315
hsa-miR-5189-5p	chr19:11230768-11231198+	chr19:11230768-11231198+	circRNA	1			145	-26.95	315
hsa-miR-3689b-3p	chr19:11230768-11231198+	chr19:11230768-11231198+	circRNA	1		0.009	145	-24.07	315
hsa-miR-3689c	chr19:11230768-11231198+	chr19:11230768-11231198+	circRNA	1		0.009	145	-24.07	315
hsa-miR-6746-3p	chr19:11230768-11231198+	chr19:11230768-11231198+	circRNA	1	-0.336	-0.17	145	-23.79	315
hsa-miR-6766-5p	chr19:11230768-11231198+	chr19:11230768-11231198+	circRNA	1			145	-23.63	315
hsa-miR-6847-3p	chr19:11230768-11231198+	chr19:11230768-11231198+	circRNA	1		0.005	145	-20.38	315
hsa-miR-6834-3p	chr19:11230768-11231198+	chr19:11230768-11231198+	circRNA	1	-0.164	-0.105	145	-17.07	315
hsa-miR-4316	chr19:11230768-11231198+	chr19:11230768-11231198+	circRNA	1	-0.404	-0.256	145	-16.77	315
hsa-miR-4326	chr19:11230768-11231198+	chr19:11230768-11231198+	circRNA	1			144	-26.42	315
hsa-miR-6087	chr19:11230768-11231198+	chr19:11230768-11231198+	circRNA	1	-0.519	-0.358	144	-25.4	315
hsa-miR-4700-5p	chr19:11230768-11231198+	chr19:11230768-11231198+	circRNA	1	-0.374	-0.294	144	-24.48	315
hsa-miR-6808-5p	chr19:11230768-11231198+	chr19:11230768-11231198+	circRNA	1		0.025	144	-24.19	315
hsa-miR-4524a-5p	chr19:11230768-11231198+	chr19:11230768-11231198+	circRNA	1		0.023	144	-22.61	315
hsa-miR-450a-2-3p	chr19:11230768-11231198+	chr19:11230768-11231198+	circRNA	1		-0.017	144	-17.99	315
hsa-miR-134-3p	chr19:11230768-11231198+	chr19:11230768-11231198+	circRNA	1			144	-17.79	315
hsa-miR-650	chr19:11230768-11231198+	chr19:11230768-11231198+	circRNA	1	-0.133	-0.072	144	-17.67	315
hsa-miR-424-5p	chr19:11230768-11231198+	chr19:11230768-11231198+	circRNA	1	-0.103	-0.075	144	-17.03	315
hsa-miR-4481	chr19:11230768-11231198+	chr19:11230768-11231198+	circRNA	1	-0.128	-0.064	144	-16.78	315
hsa-miR-1266-5p	chr19:11230768-11231198+	chr19:11230768-11231198+	circRNA	1	-0.158	-0.119	144	-16.37	315
hsa-miR-4530	chr19:11230768-11231198+	chr19:11230768-11231198+	circRNA	1	-0.089	-0.03	144	-15.42	315
hsa-miR-3925-5p	chr19:11230768-11231198+	chr19:11230768-11231198+	circRNA	1	-0.074	-0.1	144	-14.36	315
hsa-miR-146b-5p	chr19:11230768-11231198+	chr19:11230768-11231198+	circRNA	1	-0.037	-0.025	144	-14.09	315
hsa-miR-1271-5p	chr19:11230768-11231198+	chr19:11230768-11231198+	circRNA	1	-0.159	-0.135	144	-9.87	315
hsa-miR-6816-5p	chr19:11230768-11231198+	chr19:11230768-11231198+	circRNA	1			143	-28.57	315
hsa-miR-6727-5p	chr19:11230768-11231198+	chr19:11230768-11231198+	circRNA	1		-0.005	143	-28.08	315
hsa-miR-6737-5p	chr19:11230768-11231198+	chr19:11230768-11231198+	circRNA	1			143	-27.36	315
hsa-miR-4690-5p	chr19:11230768-11231198+	chr19:11230768-11231198+	circRNA	1		0.034	143	-25.81	315
hsa-miR-3622a-5p	chr19:11230768-11231198+	chr19:11230768-11231198+	circRNA	1		0.018	143	-24.09	315
hsa-miR-4642	chr19:11230768-11231198+	chr19:11230768-11231198+	circRNA	1			143	-23.96	315
hsa-miR-329-3p	chr19:11230768-11231198+	chr19:11230768-11231198+	circRNA	1		-0.013	143	-22.14	315
hsa-miR-4518	chr19:11230768-11231198+	chr19:11230768-11231198+	circRNA	1	-0.158	-0.119	143	-19.17	315
hsa-miR-16-5p	chr19:11230768-11231198+	chr19:11230768-11231198+	circRNA	1	-0.076	-0.028	143	-18.49	315
hsa-miR-380-5p	chr19:11230768-11231198+	chr19:11230768-11231198+	circRNA	1		-0.043	143	-14.9	315
hsa-miR-6838-5p	chr19:11230768-11231198+	chr19:11230768-11231198+	circRNA	1	-0.085	-0.044	143	-14.6	315
hsa-miR-635	chr19:11230768-11231198+	chr19:11230768-11231198+	circRNA	1	-0.162	-0.099	143	-13.89	315
hsa-miR-6860	chr19:11230768-11231198+	chr19:11230768-11231198+	circRNA	1			142	-29.38	315
hsa-miR-663a	chr19:11230768-11231198+	chr19:11230768-11231198+	circRNA	1			142	-24.1	315
hsa-miR-4764-5p	chr19:11230768-11231198+	chr19:11230768-11231198+	circRNA	1			142	-22.56	315
hsa-miR-4524b-5p	chr19:11230768-11231198+	chr19:11230768-11231198+	circRNA	1		0.02	142	-21.77	315
hsa-miR-670-3p	chr19:11230768-11231198+	chr19:11230768-11231198+	circRNA	1		0.011	142	-18.37	315
hsa-miR-15b-5p	chr19:11230768-11231198+	chr19:11230768-11231198+	circRNA	1	-0.085	-0.044	142	-16.66	315
hsa-miR-4677-3p	chr19:11230768-11231198+	chr19:11230768-11231198+	circRNA	1	-0.084	-0.066	142	-14.01	315
hsa-miR-4710	chr19:11230768-11231198+	chr19:11230768-11231198+	circRNA	1	-0.254	-0.244	141	-25.04	315
hsa-miR-8077	chr19:11230768-11231198+	chr19:11230768-11231198+	circRNA	1			141	-23.89	315
hsa-miR-6780a-5p	chr19:11230768-11231198+	chr19:11230768-11231198+	circRNA	1		0.016	141	-22.74	315
hsa-miR-6833-3p	chr19:11230768-11231198+	chr19:11230768-11231198+	circRNA	1			141	-19.93	315
hsa-miR-3612	chr19:11230768-11231198+	chr19:11230768-11231198+	circRNA	1	-0.114	-0.041	141	-19.88	315
hsa-miR-6868-5p	chr19:11230768-11231198+	chr19:11230768-11231198+	circRNA	1	-0.124	-0.075	141	-18.42	315
hsa-miR-6892-3p	chr19:11230768-11231198+	chr19:11230768-11231198+	circRNA	1		-0.004	141	-17.71	315
hsa-miR-6499-5p	chr19:11230768-11231198+	chr19:11230768-11231198+	circRNA	1			141	-16.47	315
hsa-miR-219a-1-3p	chr19:11230768-11231198+	chr19:11230768-11231198+	circRNA	1		-0.016	141	-15.01	315
hsa-miR-7159-5p	chr19:11230768-11231198+	chr19:11230768-11231198+	circRNA	1		-0.005	141	-14.68	315
hsa-miR-522-3p	chr19:11230768-11231198+	chr19:11230768-11231198+	circRNA	1		-0.023	141	-8.47	315
hsa-miR-4758-5p	chr19:11230768-11231198+	chr19:11230768-11231198+	circRNA	1		0.035	140	-31.49	315
hsa-miR-31-5p	chr19:11230768-11231198+	chr19:11230768-11231198+	circRNA	1			140	-27.16	315
hsa-miR-4697-5p	chr19:11230768-11231198+	chr19:11230768-11231198+	circRNA	1			140	-27.03	315
hsa-miR-609	chr19:11230768-11231198+	chr19:11230768-11231198+	circRNA	1			140	-25.6	315
hsa-miR-3191-3p	chr19:11230768-11231198+	chr19:11230768-11231198+	circRNA	1	-0.198	-0.05	140	-25.55	315
hsa-miR-3147	chr19:11230768-11231198+	chr19:11230768-11231198+	circRNA	1		0.005	140	-24.91	315
hsa-miR-3126-5p	chr19:11230768-11231198+	chr19:11230768-11231198+	circRNA	1			140	-23.92	315
hsa-miR-3665	chr19:11230768-11231198+	chr19:11230768-11231198+	circRNA	1			140	-23.53	315
hsa-miR-5787	chr19:11230768-11231198+	chr19:11230768-11231198+	circRNA	1	-0.406	-0.336	140	-23.13	315
hsa-miR-4436b-3p	chr19:11230768-11231198+	chr19:11230768-11231198+	circRNA	1		0.032	140	-22.81	315
hsa-miR-1825	chr19:11230768-11231198+	chr19:11230768-11231198+	circRNA	1			140	-21.76	315
hsa-miR-125a-3p	chr19:11230768-11231198+	chr19:11230768-11231198+	circRNA	1			140	-21.56	315
hsa-miR-6772-3p	chr19:11230768-11231198+	chr19:11230768-11231198+	circRNA	1		-0.001	140	-21.3	315
hsa-miR-92a-1-5p	chr19:11230768-11231198+	chr19:11230768-11231198+	circRNA	1			140	-20.66	315
hsa-miR-4736	chr19:11230768-11231198+	chr19:11230768-11231198+	circRNA	1		0.01	140	-20.33	315
hsa-miR-92a-2-5p	chr19:11230768-11231198+	chr19:11230768-11231198+	circRNA	1		0.006	140	-20.1	315
hsa-miR-608	chr19:11230768-11231198+	chr19:11230768-11231198+	circRNA	1		-0.01	140	-19.48	315
hsa-miR-6842-3p	chr19:11230768-11231198+	chr19:11230768-11231198+	circRNA	1	-0.323	-0.244	140	-17.43	315
hsa-miR-6852-3p	chr19:11230768-11231198+	chr19:11230768-11231198+	circRNA	1	-0.101	-0.052	140	-17.29	315
hsa-miR-15a-5p	chr19:11230768-11231198+	chr19:11230768-11231198+	circRNA	1	-0.076	-0.028	140	-16.47	315
hsa-miR-195-5p	chr19:11230768-11231198+	chr19:11230768-11231198+	circRNA	1	-0.076	-0.028	140	-14.94	315
hsa-miR-377-5p	chr19:11230768-11231198+	chr19:11230768-11231198+	circRNA	1	-0.264	-0.277	140	-14.83	315
hsa-miR-6780a-3p	chr19:11230768-11231198+	chr19:11230768-11231198+	circRNA	1	-0.117	-0.104	140	-10.38	315
hsa-miR-6881-3p	chr19:11230768-11231198+	chr19:11230768-11231198+	circRNA	1	-0.027	-0.039	140	-9.08	315

## Sheet: the top 6 miRNAs
The first 6 miRNAs for hsa_circ_0006877
circRNA	miRNA	miRNA	miRNA	miRNA	miRNA	miRNA
chr19:11230768-11231198+	has-miR-1294	hsa-miR-1827	hsa-miR-326	hsa-miR-330-5p	hsa-miR-486-3p	hsa-miR-649
