# Supplementary material for: Depletion of exosomal circLDLR in follicle fluid derepresses miR-1294 function and inhibits estradiol production via CYP19A1 in polycystic ovary syndrome
Source: Aging (Albany NY). 2020 Jul 10;12(15):15414–35. doi: 10.18632/aging.103602 (PMC7467373; doi:10.18632/aging.103602)
Supplement: Supplementary Table 6 [file aging-12-103602-s001..xlsx]

## Sheet: Sheet1
genes associated with hsa_circ_0006877（circLDLR）-miRNA-mRNA ceRNA network
miRNA	SYM	Score	R	miRNAID	ncRNA	MaxScore	Maxenergy	position_miRNA	position_ncRNA
hsa-miR-1294	AKR1C2	158	2520 2540	MIMAT0005884	hsa_circ_0006877|chr19:11230767-11231198+|NM_000527|LDLR	150	-15.61	2 11	111 132
hsa-miR-1294	FZD4	158	5016 5037	MIMAT0005884	hsa_circ_0006877|chr19:11230767-11231198+|NM_000527|LDLR	150	-15.61	2 11	111 132
hsa-miR-1294	CYP19A1	150	NA	MIMAT0005884	hsa_circ_0006877|chr19:11230767-11231198+|NM_000527|LDLR	150	-15.61	2 11	111 132
hsa-miR-1827	FZD4	164	127 144	MIMAT0006767	hsa_circ_0006877|chr19:11230767-11231198+|NM_000527|LDLR	141	-15.74	2 10	275 292
hsa-miR-1827	CYP19A1	160	335 352	MIMAT0006767	hsa_circ_0006877|chr19:11230767-11231198+|NM_000527|LDLR	141	-15.74	2 10	275 292
hsa-miR-1827	AKR1C2	147	80 98	MIMAT0006767	hsa_circ_0006877|chr19:11230767-11231198+|NM_000527|LDLR	141	-15.74	2 10	275 292
hsa-miR-1827	BMP6	157	1405 1422	MIMAT0006767	hsa_circ_0006877|chr19:11230767-11231198+|NM_000527|LDLR	141	-15.74	2 10	275 292
hsa-miR-1827	FZD4	153	3997 4013	MIMAT0006767	hsa_circ_0006877|chr19:11230767-11231198+|NM_000527|LDLR	141	-15.74	2 10	275 292
hsa-miR-326	BZRAP1	156	74 93	MIMAT0000756	hsa_circ_0006877|chr19:11230767-11231198+|NM_000527|LDLR	140	-18.08	2 9	87 106
hsa-miR-326	BZRAP1	156	286 305	MIMAT0000756	hsa_circ_0006877|chr19:11230767-11231198+|NM_000527|LDLR	140	-18.08	2 9	87 106
hsa-miR-326	FZD4	145	867 887	MIMAT0000756	hsa_circ_0006877|chr19:11230767-11231198+|NM_000527|LDLR	140	-18.08	2 9	87 106
hsa-miR-330-5p	BZRAP1	170	285 305	MIMAT0004693	hsa_circ_0006877|chr19:11230767-11231198+|NM_000527|LDLR	145	-18.54	2 19	84 106
hsa-miR-330-5p	BZRAP1	170	73 93	MIMAT0004693	hsa_circ_0006877|chr19:11230767-11231198+|NM_000527|LDLR	145	-18.54	2 19	84 106
hsa-miR-330-5p	FZD4	146	867 887	MIMAT0004693	hsa_circ_0006877|chr19:11230767-11231198+|NM_000527|LDLR	145	-18.54	2 19	84 106
hsa-miR-486-3p	BZRAP1	140	805 825	MIMAT0004762	hsa_circ_0006877|chr19:11230767-11231198+|NM_000527|LDLR	155	-29.14	2 20	190 210
hsa-miR-486-3p	BZRAP1	140	593 613	MIMAT0004762	hsa_circ_0006877|chr19:11230767-11231198+|NM_000527|LDLR	155	-29.14	2 20	190 210
hsa-miR-486-3p	PTPN11	145	1 17	MIMAT0004762	hsa_circ_0006877|chr19:11230767-11231198+|NM_000527|LDLR	155	-29.14	2 20	190 210
hsa-miR-486-3p	INSR	168	3197 3218	MIMAT0004762	hsa_circ_0006877|chr19:11230767-11231198+|NM_000527|LDLR	155	-29.14	2 20	190 210
hsa-miR-486-3p	PTPN11	143	840 860	MIMAT0004762	hsa_circ_0006877|chr19:11230767-11231198+|NM_000527|LDLR	155	-29.14	2 20	190 210
hsa-miR-486-3p	ADCY7	143	343 363	MIMAT0004762	hsa_circ_0006877|chr19:11230767-11231198+|NM_000527|LDLR	155	-29.14	2 20	190 210
hsa-miR-649	FZD4	156	1595 1618	MIMAT0003319	hsa_circ_0006877|chr19:11230767-11231198+|NM_000527|LDLR	145	-12.95	2 10	44 65
hsa-miR-649	INSR	147	456 477	MIMAT0003319	hsa_circ_0006877|chr19:11230767-11231198+|NM_000527|LDLR	145	-12.95	2 10	44 65
